# Supplementary material for: C57BL/6 substrain differences in inflammatory and neuropathic nociception and genetic mapping of a major quantitative trait locus underlying acute thermal nociception
Source: PubMed Central journal article supplement — Mol Pain. 2019 Feb 5;15:1744806918825046. doi: 10.1177/1744806918825046 (PMC6365993; doi:10.1177/1744806918825046), 2019-02-05
Supplement: Supplemental_Material.pdf [file Supplemental_Material.pdf]

## SUPPLEMENTARY INFORMATION

**Supplementary Table 1 can be found near the end of this document on p.8-p.9.**

**Supplementary Table 2 can be found at the end of this document on p.10**

**Supplementary Figure 1. Formalin-induced paw licking behavior and paw edema in female and male C57BL/6J and C57BL/6N mice.** The paw licking response after injection of 2.5% formalin concentration into the right paw of C57BL/6J versus C57BL/6N mice. **(A)** female and **(C)** male mice. Changes in paw edema, as measured by the difference in the ipsilateral paw diameter between before versus after injection ( $\Delta$ PD), in C57BL/6J and C57BL/6N **(B)** female and **(D)** male mice 1 h after injection of formalin. Data are expressed as the mean  $\pm$  S.E.M. of 6 animals per group. \* $p < 0.05$  significantly different from B6J mice.

**Supplementary Figure 2. CFA-induced mechanical & thermal hypersensitivity and edema in female and male C57BL/6J & C57BL/6N mice.** Differences in mechanical paw withdrawal thresholds in C57BL/6J and C57BL/6N **(A)** female and **(C)** male mice at different days after injection of complete Freund's adjuvant (CFA, 10 % solution/20  $\mu$ l). Differences in paw withdrawal latencies ( $\Delta$  PWL=contralateral–ipsilateral hindpaw latencies) in C57BL/6J and C57BL/6N **(B)** female and **(D)** male mice. Data are expressed as the mean  $\pm$  S.E.M. of 6 mice per group. \* $p < 0.05$  significantly different from baseline (BL).

**Supplementary Figure 3. CCI-induced mechanical and thermal hypersensitivity in female and male C57BL/6J and C57BL/6N mice.** Differences in mechanical paw withdrawal thresholds in C57BL/6J and C57BL/6N **(A)** female and **(B)** male mice at different times (days) after chronic constrictive nerve injury (CCI) operation. Data are expressed as the mean  $\pm$  S.E.M. of 6 animals per group. \* $p < 0.05$  significantly different from the value of baseline (BL).

**Supplementary Figure 4: B6 parental substrain differences, QTL plots and effect plots for baseline hot plate latency in female versus male B6J x B6NJ-F2 mice. (A):** Female and male B6J mice (n=12 females, 12 male) showed lower hot plate latencies than their B6NJ counterparts (n=11females, 7 males). **(B):** When considering female F2 mice alone (n = 78), no genome-wide significant QTL was detected for hot plate sensitivity **(C):** When considering F2 males alone (n = 86), a genome-wide significant QTL was detected on chromosome 7. **(D):** Chromosome 7 LOD plot is shown for F2 females. **(E):** Chromosome 7 LOD plot is shown for F2 males. LOD = 5.67; peak = 15.30 cM (26.64 Mb); Bayes: 8.30-20.30 cM (14.78 Mb – 34.61 Mb); **(F):** Effect plot at peak associated marker (rs3148686; 31 Mb) for females (F, red bars) and males (M, blue bars). Geno = genotype at rs3148686. BB = homozygous for B6J; BN = heterozygous; NN = homozygous for B6NJ. Data for panels A and E are expressed as the mean  $\pm$  S.E.M. Horizontal lines for panels B through E indicate the significance threshold (1000x permutations).

**Supplementary Figure 5. QTLs and effect plots for hot plate latency in B6J x B6NJ-F2 mice with a prior history of repeated SAL versus OXY injections. (A,B):** Qualitatively similar, trending but non-significant QTL plots were observed, regardless of whether mice had a prior history of SAL injections (**A**; n = 83) or OXY injections (**B**; n = 81; see Methods for details on treatment history). **(C):** Corresponding to the similarly trending QTL plots, qualitatively similar decreases in hot plate latency were observed in mice with a prior history of SAL injections (black bars) versus mice with a prior history of OXY injections (white bars) injections. Mice with two copies of the B6J allele (BB) showed a lower hot plate latency (s) than mice with two copies of the B6NJ allele (NN). Heterozygous mice (BN) were intermediate. Data are expressed as the mean  $\pm$  S.E.M.

# SUPPLEMENTARY FIGURE 1

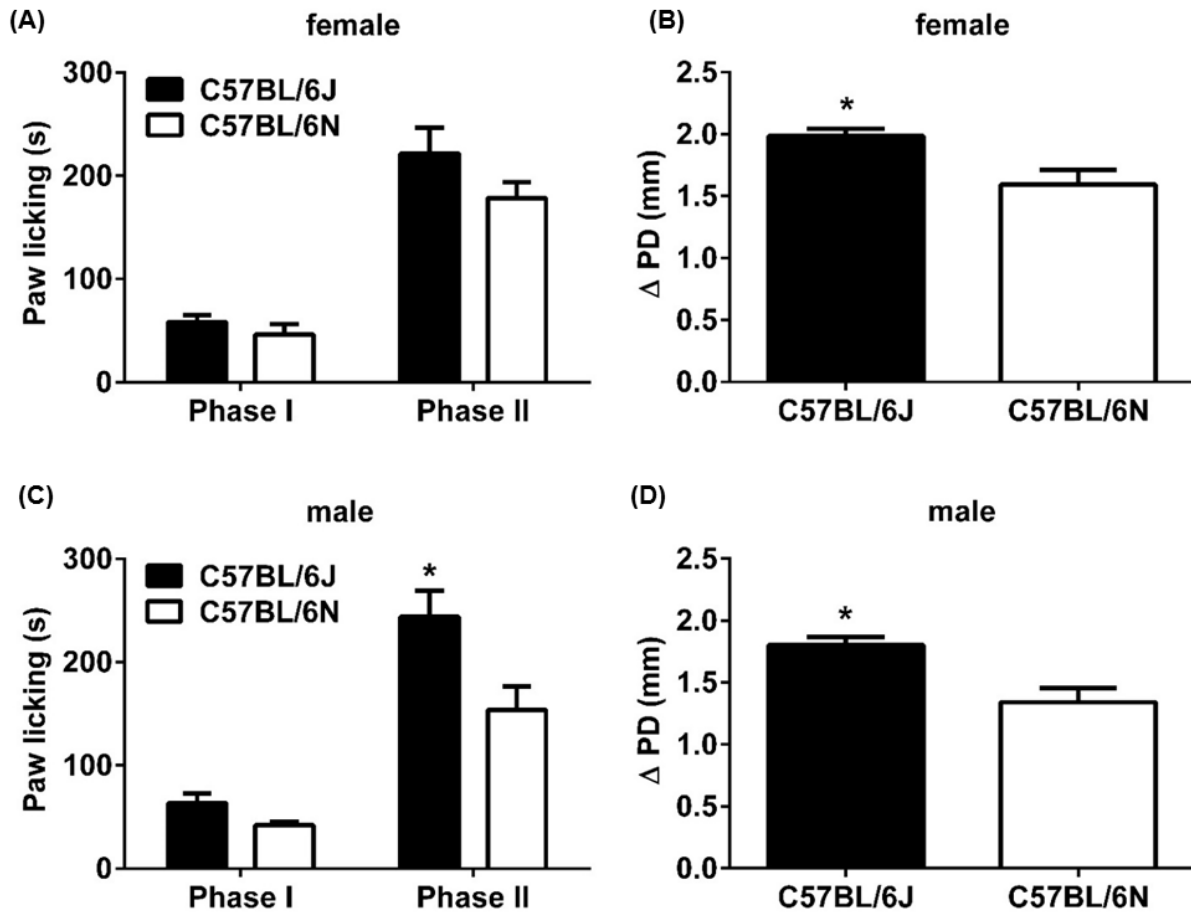

## SUPPLEMENTARY FIGURE 2

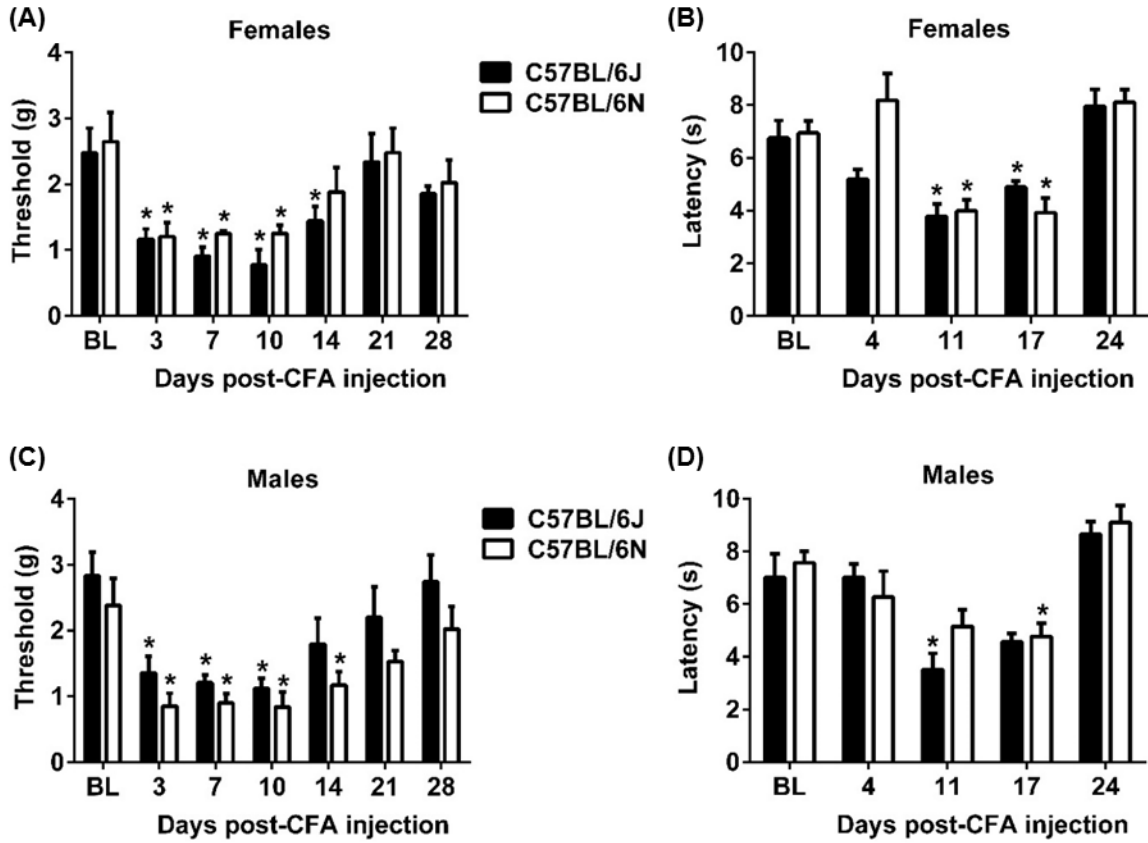

# SUPPLEMENTARY FIGURE 3

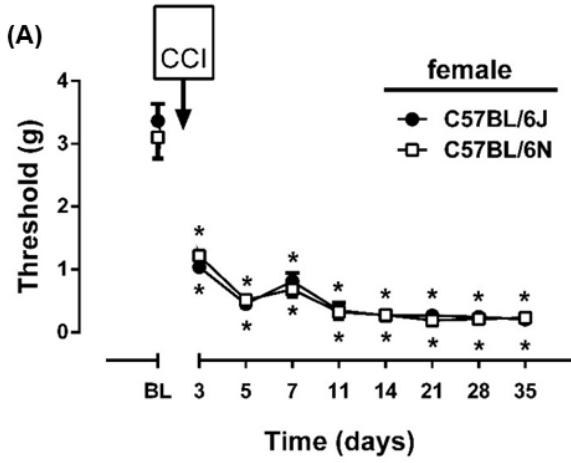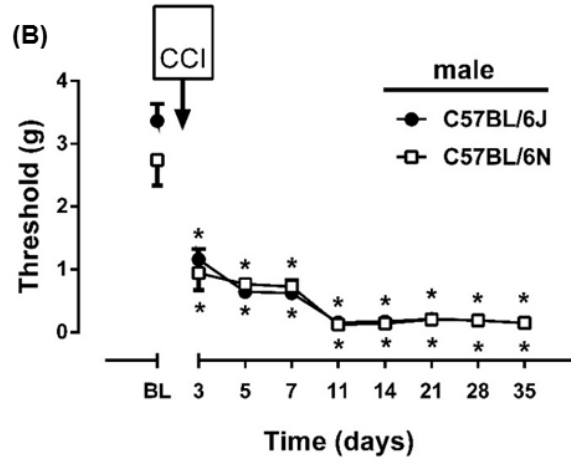

# SUPPLEMENTARY FIGURE 4

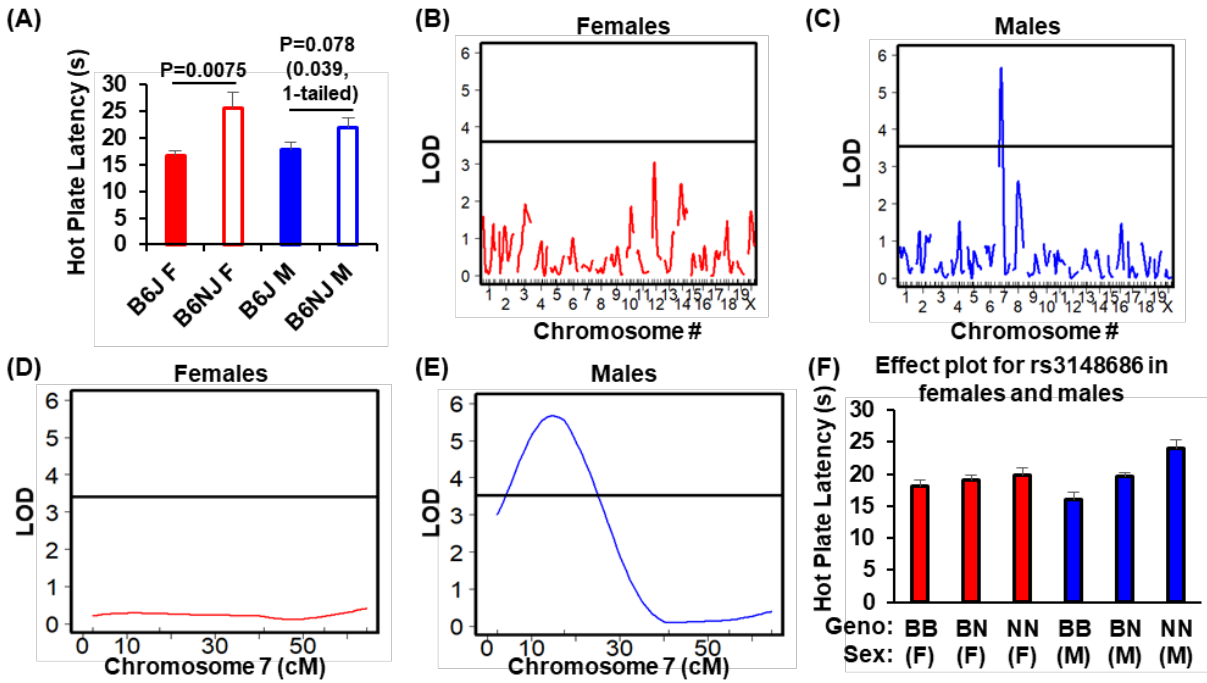

## SUPPLEMENTARY FIGURE 5

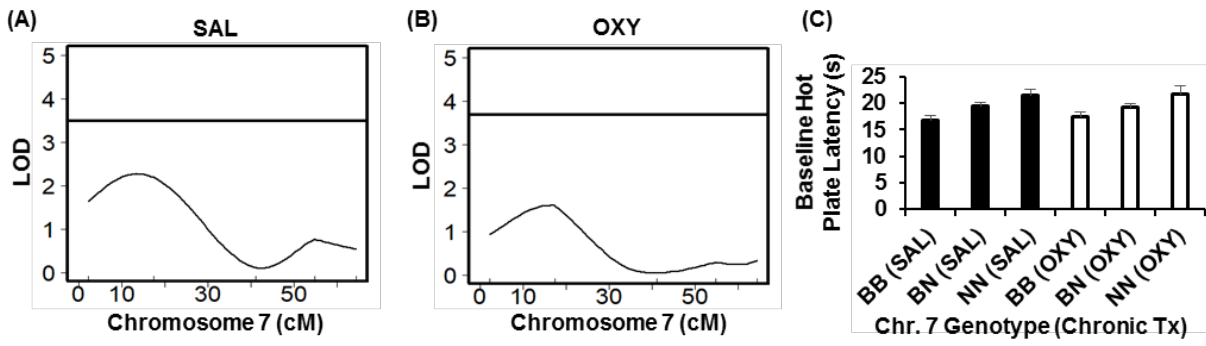

**Supplementary Table 1. SNP markers for QTL mapping.**

| Chr | Position (bp) | cM    | B6J | B6NJ | Type | dbSNP       | Target               |
|-----|---------------|-------|-----|------|------|-------------|----------------------|
| 1   | 29,549,273    | 11.33 | G   | A    | SNP  | rs263412184 | Intergenic           |
| 1   | 59,847,167    | 30.44 | G   | A    | SNP  | rs227085647 | <i>Bmpr2</i>         |
| 1   | 88,806,692    | 44.98 | C   | T    | SNP  | rs242608911 | Intergenic           |
| 1   | 116,037,566   | 51.85 | A   | C    | SNP  | rs32180662  | <i>Cntnap5a</i>      |
| 1   | 163,132,699   | 72.42 | A   | T    | SNP  | rs6341208   | Intergenic           |
| 1   | 181,318,003   | 84.58 | A   | C    | SNP  | rs51237371  | Intergenic           |
| 2   | 24,187,191    | 16.24 | A   | G    | SNP  | rs254201911 | <i>Il1f9</i>         |
| 2   | 38,946,612    | 24.43 | A   | G    | SNP  | rs33064547  | Intergenic           |
| 2   | 60,051,388    | 34.36 | A   | T    | SNP  | rs256008253 | <i>Baz2b</i>         |
| 2   | 78,799,176    | 47.11 | C   | T    | SNP  | rs33162749  | Intergenic           |
| 2   | 138,480,020   | 68.27 | T   | C    | SNP  | rs13476801  | Intergenic           |
| 2   | 152,781,403   | 75.36 | A   | G    | SNP  | rs217443774 | <i>Bcl2l1</i>        |
| 3   | 5,370,727     | 1.85  | C   | T    | SNP  | rs13476956  | Intergenic           |
| 3   | 23,824,920    | 9.23  | T   | A    | SNP  | rs13477019  | Intergenic           |
| 3   | 54,914,906    | 25.91 | A   | G    | SNP  | rs30751697  | <i>6030405A18Rik</i> |
| 3   | 95,734,876    | 41.34 | A   | G    | SNP  | rs13474735  | <i>Ecm1</i>          |
| 3   | 119,108,318   | 52.04 | A   | G    | SNP  | rs50526143  | <i>Dpyd</i>          |
| 3   | 159,811,101   | 82.64 | G   | T    | SNP  | rs260058764 | Intergenic           |
| 4   | 21,873,684    | 9.22  | C   | G    | SNP  | rs13460207  | <i>Sfrs18</i>        |
| 4   | 40,805,010    | 20.58 | A   | G    | SNP  | rs46850777  | <i>B4galt1</i>       |
| 4   | 65,944,235    | 34.50 | T   | C    | SNP  | rs13477746  | Intergenic           |
| 4   | 109,874,495   | 51.36 | A   | G    | SNP  | rs3680956   | Intergenic           |
| 4   | 124,654,566   | 57.85 | T   | G    | SNP  | rs32865425  | <i>Pou3f1</i>        |
| 4   | 138,221,673   | 70.22 | C   | T    | SNP  | rs234702424 | <i>Hp1bp3</i>        |
| 4   | 150,685,581   | 81.46 | T   | C    | SNP  | rs32407463  | Intergenic           |
| 5   | 18,710,388    | 8.37  | A   | G    | SNP  | rs33367397  | Intergenic           |
| 5   | 40,761,789    | 21.97 | C   | T    | SNP  | rs33508711  | Intergenic           |
| 5   | 59,833,642    | 31.78 | T   | C    | SNP  | rs33209545  | Intergenic           |
| 5   | 70,931,531    | 37.56 | T   | C    | SNP  | rs29547790  | Intergenic           |
| 5   | 131,541,036   | 70.96 | A   | G    | SNP  | rs3719791   | <i>Auts2</i>         |
| 5   | 149,026,872   | 89.13 | T   | C    | SNP  | rs33404968  | Intergenic           |
| 6   | 39,400,456    | 18.21 | T   | A    | SNP  | rs30899669  | <i>Mkrm1</i>         |
| 6   | 60,591,379    | 29.06 | A   | G    | SNP  | rs13478783  | Intergenic           |
| 6   | 90,159,627    | 40.07 | A   | C    | SNP  | rs245539697 | Intergenic           |
| 6   | 117,470,880   | 55.04 | C   | G    | SNP  | rs13478995  | Intergenic           |
| 6   | 145,246,710   | 77.35 | A   | G    | SNP  | rs30119689  | <i>Kras</i>          |
| 7   | 4,006,930     | 2.30  | A   | G    | SNP  | rs31995355  | Intergenic           |
| 7   | 30,306,475    | 17.41 | A   | G    | SNP  | rs3148686   | <i>Clip3</i>         |
| 7   | 71,816,909    | 41.11 | C   | G    | SNP  | rs32060039  | Intergenic           |
| 7   | 102,973,309   | 54.80 | C   | T    | SNP  | rs243575509 | Intergenic           |
| 7   | 120,135,179   | 64.46 | G   | A    | SNP  | rs235606231 | <i>Zp2</i>           |
| 8   | 14,127,388    | 6.54  | C   | T    | SNP  | rs236928053 | <i>Dlgap2</i>        |
| 8   | 29,097,075    | 16.52 | T   | C    | SNP  | rs13479672  | Intergenic           |



|    |             |       |   |   |     |             |                      |
|----|-------------|-------|---|---|-----|-------------|----------------------|
| 8  | 59,125,561  | 30.78 | T | C | SNP | rs245638874 | Intergenic           |
| 8  | 85,365,179  | 41.58 | A | T | SNP | rs245783224 | <i>Mylk3</i>         |
| 8  | 119,945,761 | 68.67 | C | T | SNP | rs230879074 | <i>Gm20388</i>       |
| 9  | 3,994,759   | 0.39  | C | T | SNP | rs226723272 | Intergenic           |
| 9  | 25,130,622  | 10.16 | C | G | SNP | rs217366063 | <i>Herpud2</i>       |
| 9  | 58,886,107  | 31.82 | G | A | SNP | rs238448868 | <i>Neo1</i>          |
| 9  | 86,220,923  | 46.49 | A | C | SNP | rs30522453  | Intergenic           |
| 9  | 120,016,907 | 71.41 | T | G | SNP | rs49019729  | <i>Xirp1</i>         |
| 10 | 29,612,666  | 16.69 | C | A | SNP | rs29330320  | Intergenic           |
| 10 | 67,238,174  | 34.92 | T | C | SNP | rs13480628  | <i>Jmjd1c</i>        |
| 10 | 88,091,833  | 43.81 | T | C | SNP | rs246274290 | <i>4930547N16Rik</i> |
| 11 | 30,675,691  | 18.15 | A | C | SNP | rs48169870  | Intergenic           |
| 11 | 46,222,615  | 27.63 | G | A | SNP | rs240617401 | <i>Cyfp2</i>         |
| 11 | 90,480,671  | 55.09 | C | T | SNP | rs238893157 | <i>Stxbp4</i>        |
| 11 | 120,306,788 | 84.05 | T | C | SNP | rs49027247  | Intergenic           |
| 12 | 28,409,763  | 10.93 | G | T | SNP | rs29165094  | Intergenic           |
| 12 | 55,758,373  | 24.10 | G | T | SNP | rs6385807   | Intergenic           |
| 12 | 91,595,674  | 44.60 | A | C | SNP | rs235238684 | Intergenic           |
| 12 | 117,167,625 | 62.92 | C | T | SNP | rs229717662 | <i>Ptprn2</i>        |
| 13 | 27,037,150  | 12.24 | A | G | SNP | rs13481734  | Intergenic           |
| 13 | 52,758,052  | 27.35 | T | C | SNP | rs29248623  | Intergenic           |
| 13 | 88,426,920  | 45.27 | G | A | SNP | rs29622109  | Intergenic           |
| 13 | 119,143,521 | 67.25 | C | T | SNP | rs29235721  | Intergenic           |
| 14 | 9,937,385   | 5.80  | G | A | SNP | rs31187642  | Intergenic           |
| 14 | 74,415,721  | 39.25 | T | A | SNP | rs30264676  | Intergenic           |
| 14 | 90,847,095  | 45.14 | G | T | SNP | rs262164631 | Intergenic           |
| 14 | 116,603,597 | 60.23 | A | C | SNP | rs236603300 | Intergenic           |
| 15 | 11,336,383  | 5.58  | G | T | SNP | rs246033409 | <i>Adamts12</i>      |
| 15 | 37,462,413  | 14.99 | A | T | SNP | rs31810918  | Intergenic           |
| 15 | 71,632,551  | 32.31 | T | C | SNP | rs31858887  | Intergenic           |
| 16 | 12,261,912  | 7.23  | T | C | SNP | rs4162529   | <i>Shisa9</i>        |
| 16 | 35,291,544  | 25.15 | G | A | SNP | rs258334795 | <i>Adcy5</i>         |
| 16 | 60,954,616  | 36.06 | C | G | SNP | rs4193066   | Intergenic           |
| 16 | 90,181,009  | 51.59 | C | G | SNP | rs4217166   | Intergenic           |
| 17 | 5,332,903   | 3.15  | T | C | SNP | rs4137196   | <i>Arid1b</i>        |
| 17 | 26,854,246  | 13.56 | A | T | SNP | rs46703123  | Intergenic           |
| 17 | 67,752,883  | 38.88 | G | A | SNP | rs33387924  | <i>Lama1</i>         |
| 18 | 9,450,891   | 4.87  | C | G | SNP | rs29560146  | Intergenic           |
| 18 | 54,614,841  | 29.22 | A | C | SNP | rs13483369  | Intergenic           |
| 18 | 90,448,757  | 59.64 | A | G | SNP | rs263687961 | Intergenic           |
| 19 | 9,027,005   | 6.04  | G | C | SNP | rs31112038  | <i>Ahnak</i>         |
| 19 | 16,602,218  | 11.66 | T | C | SNP | rs30709918  | Intergenic           |
| 19 | 52,359,370  | 46.77 | A | G | SNP | rs30608930  | Intergenic           |
| X  | 64,312,439  | 34.62 | C | T | SNP | rs246222509 | Intergenic           |
| X  | 90,719,435  | 40.39 | A | C | SNP | rs221876655 | Intergenic           |
| X  | 120,419,803 | 49.63 | T | A | SNP | rs226119295 | <i>Pcdh11x</i>       |
| X  | 152,774,935 | 70.34 | A | G | SNP | rs226776950 | intergenic           |

**Supplementary Table 2. Genes possessing *cis*-eQTLs within the chromosome 7 hot plate QTL that also possess genetic variants.**

| Chr | Position | Gene   | dbSNP                   | Ref      | C57BL_6NJ          | Csq                                                          |
|-----|----------|--------|-------------------------|----------|--------------------|--------------------------------------------------------------|
| 7   | 12920539 | Rps5   | rs52344512              | G        | T                  | upstream_gene_variant                                        |
| 7   | 12925890 | Rps5   | -                       | T        | t/g*               | intron_variant upstream_gene_variant downstream_gene_variant |
| 7   | 25104248 | Pou2f2 | -                       | C        | c/t                | intron_variant                                               |
| 7   | 25109388 | Pou2f2 | -                       | A        | a/c                | intron_variant                                               |
| 7   | 25137484 | Pou2f2 | -                       | CCTCTGCC | C*                 | intron_variant upstream_gene_variant                         |
| 7   | 25139545 | Pou2f2 | rs233121482;rs242658957 | CTCTCCTT | cctctcctt/cctcctt* | intron_variant                                               |
| 7   | 25139566 | Pou2f2 | -                       | T        | TC*                | intron_variant                                               |
| 7   | 25156931 | Pou2f2 | -                       | T        | t/g*               | intron_variant downstream_gene_variant                       |
| 7   | 27315143 | Ltbp4  | rs238888133             | T        | TC*                | intron_variant upstream_gene_variant                         |
| 7   | 27337648 | Ltbp4  | -                       | A        | a/c*               | 5'UTR                                                        |
| 7   | 28772685 | Sirt2  | -                       | T        | t/g*               | intron_variant upstream_gene_variant                         |
| 7   | 28777599 | Sirt2  | rs235180046             | T        | TGATA*             | intron_variant                                               |
| 7   | 28933274 | Actn4  | -                       | C        | c/a                | intron_variant                                               |
| 7   | 28933277 | Actn4  | rs587198568             | C        | c/a                | intron_variant                                               |
| 7   | 28953469 | Actn4  | -                       | T        | t/g*               | intron_variant upstream_gene_variant                         |
| 7   | 29034448 | Ryr1   | rs232379481             | CAT      | C                  | intron_variant                                               |
| 7   | 29034450 | Ryr1   | -                       | T        | C                  | intron_variant                                               |
| 7   | 29034466 | Ryr1   | -                       | C        | c/g                | intron_variant                                               |
| 7   | 29034467 | Ryr1   | -                       | A        | a/c                | intron_variant                                               |
| 7   | 29034468 | Ryr1   | -                       | C        | c/a                | intron_variant                                               |
| 7   | 29044042 | Ryr1   | -                       | T        | t/g                | intron_variant                                               |
| 7   | 29045754 | Ryr1   | -                       | C        | c/a                | intron_variant                                               |
| 7   | 29046466 | Ryr1   | rs243592502             | G        | g/c                | intron_variant                                               |
| 7   | 29055959 | Ryr1   | -                       | G        | g/a                | intron_variant                                               |
| 7   | 30305589 | Clip3  | -                       | T        | t/g*               | intron_variant upstream_gene_variant                         |
| 7   | 30306475 | Clip3  | rs3148686               | A        | G*                 | intron_variant upstream_gene_variant                         |
| 7   | 30625151 | Cox6b1 | -                       | A        | a/c                | intron_variant                                               |
